# Supplementary material for: A new p-terphenyl derivative from the insect-derived fungus Aspergillus candidus Bdf-2 and the synergistic effects of terphenyllin
Source: PeerJ. 2020 Jan 2;8:e8221. doi: 10.7717/peerj.8221 (PMC6942676; doi:10.7717/peerj.8221)
Supplement: Supplemental Information 1 — MIC values of the compounds and positive control were obtained from the sterile 96-well plates directly, so we didn’t provided the statistics. [file peerj-08-8221-s002.xlsx]

## Sheet: Sheet2
Com. Strains	E. coli	S. S. aureus	R. solanacearum
1	-	-	-
2	-	-	-
3	-	-	-
4	-	-	-
5	-	64	64
6	-	32	32
7	-	64	64
8	-	-	-
9	-	256	256
2+1	-	64	64
2+3	-	-	-
2+4	-	128	256
2+5	128	32	64
2+6	-	4	128
2+7	256	16	64
5+6	256	16	32
2+4+5	-	64	64
2+4+5+6	-	64	64
1+2+3+4+5+6+7	256	64	32
Amikacin	1	1	1
